# Supplementary material
Source: ML conference proceedings conference paper supplement (https://proceedings.mlr.press/v119/laskin20a.html)
Supplement: Supplementary file [file laskin20a-supp.pdf]

## A. Implementation Details

Below, we explain the implementation details for CURL in the DMControl setting. Specifically, we use the SAC algorithm as the RL objective coupled with CURL and build on top of the publicly released implementation from Yarats et al. (2019). We present in detail the hyperparameters for the architecture and optimization. We do not use any extra hyperparameter for balancing the contrastive loss and the reinforcement learning losses. Both the objectives are weighed equally in the gradient updates.

Table 3. Hyperparameters used for DMControl CURL experiments. Most hyperparameters values are unchanged across environments with the exception for action repeat, learning rate, and batch size.

| Hyperparameter                                                | Value                                                              |
|---------------------------------------------------------------|--------------------------------------------------------------------|
| Random crop                                                   | True                                                               |
| Observation rendering                                         | (100, 100)                                                         |
| Observation downsampling                                      | (84, 84)                                                           |
| Replay buffer size                                            | 100000                                                             |
| Initial steps                                                 | 1000                                                               |
| Stacked frames                                                | 3                                                                  |
| Action repeat                                                 | 2 finger, spin; walker, walk<br>8 cartpole, swingup<br>4 otherwise |
| Hidden units (MLP)                                            | 1024                                                               |
| Evaluation episodes                                           | 10                                                                 |
| Optimizer                                                     | Adam                                                               |
| $(\beta_1, \beta_2) \rightarrow (f_\theta, \pi_\psi, Q_\phi)$ | (.9, .999)                                                         |
| $(\beta_1, \beta_2) \rightarrow (\alpha)$                     | (.5, .999)                                                         |
| Learning rate $(f_\theta, \pi_\psi, Q_\phi)$                  | $2e - 4$ cheetah, run<br>$1e - 3$ otherwise                        |
| Learning rate $(\alpha)$                                      | $1e - 4$                                                           |
| Batch Size                                                    | 512 (cheetah), 128 (rest)                                          |
| Q function EMA $\tau$                                         | 0.01                                                               |
| Critic target update freq                                     | 2                                                                  |
| Convolutional layers                                          | 4                                                                  |
| Number of filters                                             | 32                                                                 |
| Non-linearity                                                 | ReLU                                                               |
| Encoder EMA $\tau$                                            | 0.05                                                               |
| Latent dimension                                              | 50                                                                 |
| Discount $\gamma$                                             | .99                                                                |
| Initial temperature                                           | 0.1                                                                |

**Architecture:** We use an encoder architecture that is similar to (Yarats et al., 2019), which we sketch in PyTorch-like pseudocode below. The actor and critic both use the same encoder to embed image observations. A full list of hyperparameters is displayed in Table 3.

For contrastive learning, CURL utilizes momentum for the key encoder (He et al., 2019b) and a bi-linear inner product as the similarity measure (van den Oord et al., 2018). Performance curves ablating these two architectural choices are shown in Figure 5.

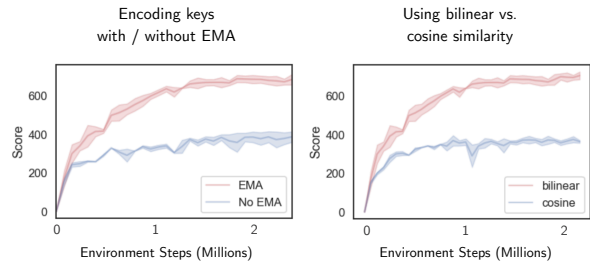

Figure 5. Performance on cheetah-run environment ablated two-ways: (left) using the query encoder or exponentially moving average of the query encoder for encoding keys (right) using the bi-linear inner product as in (van den Oord et al., 2018) or the cosine inner product as in He et al. (2019b); Chen et al. (2020)

Pseudo-code for the architecture is provided below:

```
def encode(x, z_dim):
    """
    ConvNet encoder
    args:
        B=batch_size, C-channels
        H,W-spatial_dims
        x : shape : [B, C, H, W]
        C = 3 * num_frames; 3 - R/G/B
        z_dim: latent dimension
    """
    x = x / 255.

    # c: channels, f: filters
    # k: kernel, s: stride

    z = Conv2d(c=x.shape[1], f=32, k=3, s=2))(x)
    z = ReLU(z)

    for _ in range(num_layers - 1):
        z = Conv2d((c=32, f=32, k=3, s=1))(z)
        z = ReLU(z)

    z = flatten(z)

    # in: input dim, out: output_dim, h:
    #     hiddens

    z = mlp(in=z.size(), out=z_dim, h=1024)
    z = LayerNorm(z)
    z = tanh(z)
```

**Terminology:** A common point of confusion is the meaning “training steps.” We use the term *environment steps* to denote the amount of times the simulator environment is stepped through and *interaction steps* to denote the number of times the agent steps through its policy. The terms *action repeat* or *frame skip* refer to the number of times an action

is repeated when it's drawn from the agent's policy. For example, if action repeat is set to 4, then 100k interaction steps is equivalent to 400k environment steps.

**Batch Updates:** After initializing the replay buffer with observations extracted by a random agent, we sample a batch of observations, compute the CURL objectives, and step through the optimizer. Note that since queries and keys are generated by data-augmenting an observation, we can generate arbitrarily many keys to increase the contrastive batch size without sampling any additional observations.

**Shared Representations:** The objective of performing contrastive learning together with RL is to ensure that the shared encoder learns rich features that facilitate sample efficient control. There is a subtle coincidental connection between MoCo and off-policy RL. Both the frameworks adopt the usage of a momentum averaged (EMA) version of the underlying model. In MoCo, the EMA encoder is used for encoding the keys (targets) while in off-policy RL, the EMA version of the Q-networks are used as targets in the Bellman error (Mnih et al., 2015; Haarnoja et al., 2018). Thanks to this connection, CURL shares the convolutional encoder, momentum coefficient and EMA update between contrastive and reinforcement learning updates for the shared parameters. The MLP part of the critic that operates on top of these convolutional features has a separate momentum coefficient and update decoupled from the image encoder parameters.

**Balancing Contrastive and RL Updates:** While past work has learned hyperparameters to balance the auxiliary loss coefficient or learning rate relative to the RL objective (Jaderberg et al., 2016; Yarats et al., 2019), CURL does not need any such adjustments. We use both the contrastive and RL objectives together with equal weight and learning rate. This simplifies the training process compared to other methods, such as training a VAE jointly (Hafner et al., 2018; 2019; Lee et al., 2019), that require careful tuning of coefficients for representation learning.

**Differences in Data Collection between Computer Vision and RL Settings:** There are two key differences between contrastive learning in the computer vision and RL settings because of their different goals. Unsupervised feature learning methods built for downstream vision tasks like image classification assume a setting where there is a large static dataset of unlabeled images. On the other hand, in RL, the dataset changes over time to account for the agent's new experiences. Secondly, the size of the memory bank of labeled images and dataset of unlabeled ones in vision-based settings are 65K and 1M (or 1B) respectively. The goal in vision-based methods is to learn from millions of unlabeled images. On the other hand, the goal in CURL is to develop sample-efficient RL algorithms. For example, to be able to solve a task within 100K timesteps (approximately 2 hours in real-time), an agent can only ingest 100K image frames.

Therefore, unlike MoCo, CURL does not use a memory bank for contrastive learning. Instead, the negatives are constructed on the fly for every minibatch sampled from the agent's replay buffer for an RL update similar to SimCLR. The exact implementation is provided as a PyTorch-like code snippet in 4.7.

#### Data Augmentation:

Random crop data augmentation has been crucial for the performance of deep learning based computer vision systems in object recognition, detection and segmentation (Krizhevsky et al., 2012; Szegedy et al., 2015; Cubuk et al., 2019; Chen et al., 2020). However, similar augmentation methods have not seen much adoption in the field of RL even though several benchmarks use raw pixels as inputs to the model.

CURL adopts the random crop data augmentation as the stochastic data augmentation applied to a frame stack. To make it easier for the model to correlate spatio-temporal patterns in the input, we apply the same random crop (in terms of box coordinates) across all four frames in the stack as opposed to extracting different random crop positions from each frame in the stack. Further, unlike in computer vision systems where the aspect ratio for random crop is allowed to be as low as 0.08, we preserve much of the spatial information as possible and use a constant aspect ratio of 0.84 between the original and cropped. In our experiments, data augmented samples for CURL are formed by cropping  $84 \times 84$  frames from an input frame of  $100 \times 100$ .

**DMControl:** We render observations at  $100 \times 100$  and randomly crop  $84 \times 84$  frames. For evaluation, we render observations at  $100 \times 100$  and center crop to  $84 \times 84$  pixels. We found that implementing random crop efficiently was extremely important to the success of the algorithm. We provide pseudocode below:

```
from skimage import view_as_windows
import numpy as np

def random_crop(imgs, out):
    """
    Vectorized random crop
    args:
        imgs: shape (B,C,H,W)
        out: output size (e.g. 84)
    """

    # n: batch size.
    n = imgs.shape[0]
    img_size = imgs.shape[-1] # e.g. 100
    crop_max = img_size - out

    imgs = np.transpose(imgs, (0, 2, 3, 1))

    w1 = np.random.randint(0, crop_max, n)
    h1 = np.random.randint(0, crop_max, n)

    # creates all sliding window
    # combinations of size (out)

    windows = view_as_windows(
        imgs, (1, out, out, 1))[..., 0, :, :, 0]
```

```
# selects a random window
# for each batch element
cropped = windows[np.arange(n), w1, h1]
return cropped
```

### B. Atari100k Implementation Details

The flexibility of CURL allows us to apply it to discrete control setting with minimal modifications. Similar to our rationale for picking SAC as the baseline RL algorithm to couple CURL with (for continuous control), we pick the data-efficient version of Rainbow DQN (Efficient Rainbow) (van Hasselt et al., 2019) for Atari100K which performs competitively with an older version of SimPLe (most recent version has improved numbers). In order to understand *specifically* what the gains from CURL are without any other changes, we adopt the *exact* same hyperparameters specified in the paper (van Hasselt et al., 2019) (including a modified convolutional encoder that uses larger kernel size and stride of 5). We present the details in Table 4. Similar to DMControl, the contrastive objective and the RL objective are weighted equally for learning (except for Pong, Freeway, Boxing and PrivateEye for which we used a coefficient of 0.05 for the momentum contrastive loss. On a large majority (22 out of 26) of the games, we do not use this adjustment. While it is standard practice to use the same hyperparameters for all games in Atari, papers proposing auxiliary losses have adopted a different practice of using game specific coefficients (Jaderberg et al., 2016).). We use the Efficient Rainbow codebase from <https://github.com/Kaixhin/Rainbow> which has a reproduced version of van Hasselt et al. (2019). We evaluate with 20 random seeds and report the mean score for each game given the high variance nature of the Atari100k steps benchmark. We restrict ourselves to using grayscale renderings of image observations and use random crop of frame stack as data augmentation.

### C. Benchmarking Data Efficiency

Tables 1 and 2 show the episode returns of DMControl100k, DMControl500k, and Atari100k across CURL and a number of pixel-based baselines. CURL outperforms all baseline pixel-based methods across experiments on both DMControl100k and DMControl500k. On Atari100k experiments, CURL coupled with Eff Rainbow outperforms the baseline on the majority of games tested (19 out of 26 games).

### D. Further Investigation of Data-Efficiency in Contrastive RL

To further benchmark CURL’s sample-efficiency, we compare it to state-based SAC on a total of 16 DMControl environments. Shown in Figure 7, CURL matches state-based

Table 4. Hyperparameters used for Atari100K CURL experiments. Hyperparameters are unchanged across games.

| Hyperparameter                   | Value                   |
|----------------------------------|-------------------------|
| Random crop                      | True                    |
| Image size                       | (84, 84)                |
| Data Augmentation                | Random Crop (Train)     |
| Replay buffer size               | 100000                  |
| Training frames                  | 400000                  |
| Training steps                   | 100000                  |
| Frame skip                       | 4                       |
| Stacked frames                   | 4                       |
| Action repeat                    | 4                       |
| Replay period every              | 1                       |
| Q network: channels              | 32, 64                  |
| Q network: filter size           | 5 × 5, 5 × 5            |
| Q network: stride                | 5, 5                    |
| Q network: hidden units          | 256                     |
| Momentum (EMA for CURL) $\tau$   | 0.001                   |
| Non-linearity                    | ReLU                    |
| Reward Clipping                  | [−1, 1]                 |
| Multi step return                | 20                      |
| Minimum replay size for sampling | 1600                    |
| Max frames per episode           | 108K                    |
| Update                           | Distributional Double Q |
| Target Network Update Period     | every 2000 updates      |
| Support-of-Q-distribution        | 51 bins                 |
| Discount $\gamma$                | 0.99                    |
| Batch Size                       | 32                      |
| Optimizer                        | Adam                    |
| Optimizer: learning rate         | 0.0001                  |
| Optimizer: $\beta_1$             | 0.9                     |
| Optimizer: $\beta_2$             | 0.999                   |
| Optimizer $\epsilon$             | 0.000015                |
| Max gradient norm                | 10                      |
| Exploration                      | Noisy Nets              |
| Noisy nets parameter             | 0.1                     |
| Priority exponent                | 0.5                     |
| Priority correction              | 0.4 → 1                 |
| Hardware                         | CPU                     |

data-efficiency on most of the environments, but lags behind state-based SAC on more challenging environments.

### E. Ablations

#### E.1. Learning Temporal Dynamics

To gain insight as to whether CURL learns temporal dynamics across the stacked frames, we also train a variant of CURL where the discriminants are individual frames as opposed to stacked ones. This can be done by sampling stacked frames from the replay buffer but only using the first frame to update the contrastive loss:

```
f_q = x_q[:, :3, ...] # (B, C, H, W), C=9.
f_k = x_k[:, :3, ...]
```

During the actor-critic update, frames in the batch are en-

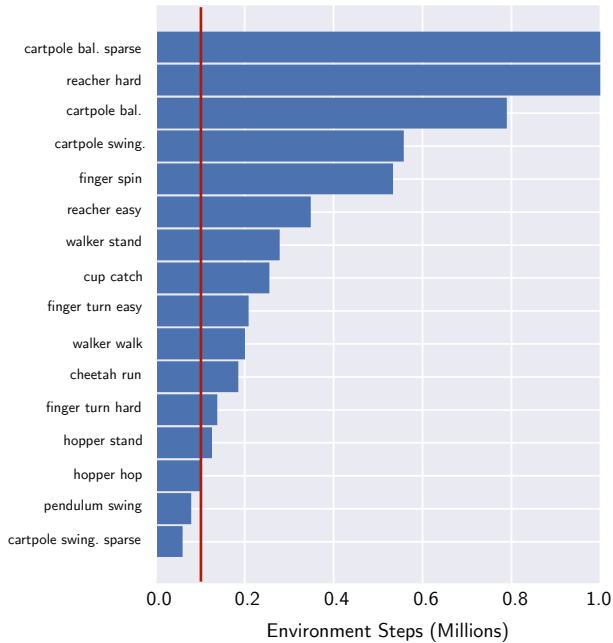

Figure 6. The number of steps it takes a prior leading pixel-based method, Dreamer, to achieve the same score that CURL achieves at 100k training steps (clipped at 1M steps). On average, CURL is 4.5x more data-efficient. We chose Dreamer because the authors (Hafner et al., 2019) report performance for all of the above environments while other baselines like SLAC and SAC+AE only benchmark on 4 and 6 environments, respectively. For further comparison of CURL with these methods, the reader is referred to Table 1 and Figure 4.

coded individually into latent codes, which are then concatenated before being passed to a dense network.

```
# x: (B, C, H, W), C=9.
z1 = encode(x[:, :3, ...])
z2 = encode(x[:, 3:6, ...])
z3 = encode(x[:, 6:9, ...])
z = torch.cat([z1, z2, z3], -1)
```

Encoding each frame individually ensures that the contrastive objective only has access to visual discriminants. Comparing the visual and spatiotemporal variants of CURL in Figure 8 shows that the variant trained on stacked frames outperforms the visual-only version in most environments. The only exceptions are reacher and ball-in-cup environments. Indeed, in those environments the visual signal is strong enough to solve the task optimally, whereas in other environments, such as walker and cheetah, where balance or coordination is required, visual information alone is insufficient.

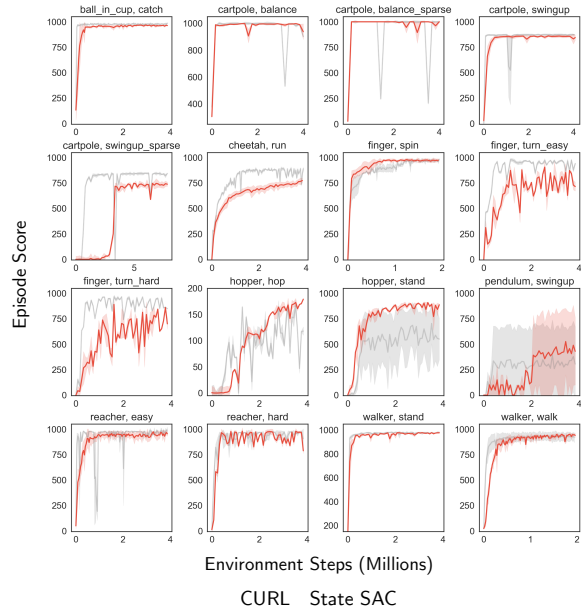

Figure 7. CURL compared to state-based SAC run for 3 seeds on each of 16 selected DMControl environments. For the 6 environments in 4, CURL performance is averaged over 10 seeds.

### E.2. Increasing Gradient Updates per Agent Step

Although most baselines we benchmark against use one gradient update per agent step, it was recently empirically shown that increasing the ratio of gradients per step improves data-efficiency in RL (Kielak, 2020). This finding is also supported by SLAC (Lee et al., 2019), where results are shown with a ratio of 1:1 (SLACv1) and 3:1 (SLACv2). We

Table 5. Scores achieved by CURL and SLAC when run with a 3:1 ratio of gradient updates per agent step on DMControl500k and DMControl100k. CURL achieves state-of-the-art performance on the majority (3 out of 4) environments on DMControl500k. Performance of both algorithms is improved relative to the 1:1 ratio reported for all baselines in Table 1 but at the cost of significant compute and wall-clock time overhead.

| DMCONTROL500K      | CURL             | SLACv2          |
|--------------------|------------------|-----------------|
| FINGER, SPIN       | <b>923 ± 50</b>  | 884 ± 98        |
| WALKER, WALK       | <b>911 ± 35</b>  | 891 ± 60        |
| CHEETAH, RUN       | 545 ± 39         | <b>791 ± 37</b> |
| BALL IN CUP, CATCH | <b>948 ± 21</b>  | 885 ± 154       |
| DMCONTROL100K      | CURL             | SLACv2          |
| FINGER, SPIN       | <b>741 ± 118</b> | 728 ± 212       |
| WALKER, WALK       | 428 ± 59         | <b>513 ± 41</b> |
| CHEETAH, RUN       | 314 ± 46         | <b>438 ± 76</b> |
| BALL IN CUP, CATCH | <b>899 ± 47</b>  | 837 ± 147       |

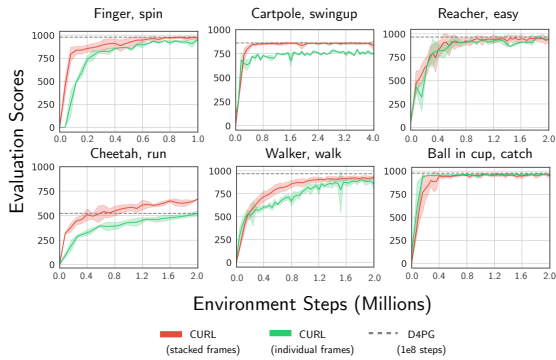

Figure 8. CURL with temporal and visual discrimination (red) compared to CURL with only visual discrimination (green). In most settings, the variant with temporal variant outperforms the purely visual variant of CURL. The two exceptions are reacher and ball in cup environments, suggesting that learning dynamics is not necessary for those two environments. Note that the walker environment was run with action repeat of 4, whereas walker walk in the main results Table 1 and Figure 7 was run with action repeat of 2.

### E.3. Decoupling Representation Learning from Reinforcement Learning

Typically, Deep RL representations depend almost entirely on the reward function specific to a task. However, handcrafted representations such as the proprioceptive state are independent of the reward function. It is much more desirable to learn reward-agnostic representations, so that the same representation can be re-used across different RL tasks. We test whether CURL can learn such representations by comparing CURL to a variant where the critic gradients are backpropagated through the critic and contrastive dense feedforward networks but stopped before reaching the convolutional neural network (CNN) part of the encoder.

Scores displayed in Figure 9 show that for many environments, the detached CNN representations are sufficient to learn an optimal policy. The major exception is the cheetah environment, where the detached representation significantly under-performs. Though promising, we leave further exploration of task-agnostic representations for future work.

### E.4. Predicting State from Pixels

Despite improved sample-efficiency on most DMControl tasks, there is still a visible gap between the performance of SAC on state and SAC with CURL in some environments. Since CURL learns representations by performing instance

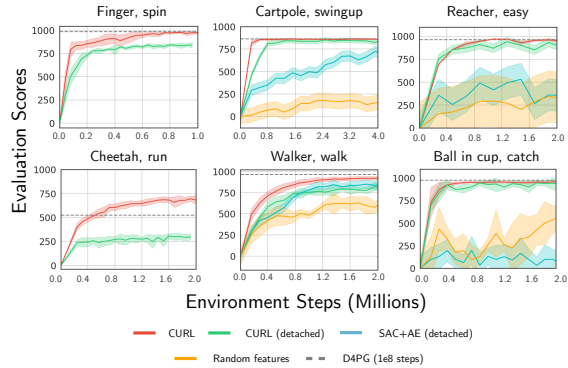

Figure 9. CURL where the CNN part of the encoder receives gradients from both the contrastive loss and critic (red) compared to CURL with the convolutional part of the encoder trained only with the contrastive objective (green). The detached encoder variant is able to learn representations that enable near-optimal learning on most environments, except for cheetah. As in Figure 8, the walker environment was run with action repeat of 4.

discrimination across stacks of three frames, it’s possible that the reason for degraded sample-efficiency on more challenging tasks is due to partial-observability of the ground truth state.

To test this hypothesis, we perform supervised regression  $(X, Y)$  from pixels  $X$  to the proprioceptive state  $Y$ , where each data point  $x \in X$  is a stack of three consecutive frames and  $y \in Y$  is the corresponding state extracted from the simulator. We find that the error in predicting the state from pixels correlates with the policy performance of pixel-based methods. Test-time error rates displayed in Figure 10 show that environments that CURL solves as efficiently as state-based SAC have low error-rates in predicting the state from stacks of pixels. The prediction error increases for more challenging environments, such as cheetah-run and walker-walk. Finally, the error is highest for environments where current pixel-based methods, CURL included, make no progress at all (Tassa et al., 2018), such as humanoid and swimmer.

This investigation suggests that degraded policy performance on challenging tasks may result from the lack of requisite information about the underlying state in the pixel data used for learning representations. We leave further investigation for future work.

### E.5. CURL + Efficient Rainbow Atari runs

We report the scores (Tables 6 and 7) for 20 seeds across the 26 Atari games in the Atari100k benchmark for CURL cou-

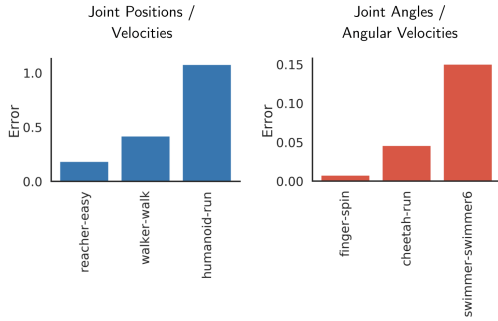

*Figure 10.* Test-time mean squared error for predicting the proprioceptive state from pixels on a number of DMControl environments. In DMControl, environments fall into two groups - where the state corresponds to either (a) positions and velocities of the robot joints or (b) the joint angles and angular velocities.

pled with Efficient Rainbow. The variance across multiple seeds is considerably high in this benchmark. Therefore, we report the scores for each of the seeds along with the mean and standard deviation for each game.

**CURL: Contrastive Unsupervised Representations for Reinforcement Learning**

| Pacman | Frostbite | Asterix | KungFuMaster | Kangaroo | Gopher | RoadRunner | JamesBond | BattleZone | Seaquest | Assault | Krull   | Qbert  |
|--------|-----------|---------|--------------|----------|--------|------------|-----------|------------|----------|---------|---------|--------|
| 1287   | 2292      | 850     | 8470         | 600      | 1036   | 2820       | 305       | 18100      | 322      | 634.2   | 3404.3  | 1020   |
| 1608   | 1046      | 525     | 10870        | 2280     | 574    | 3190       | 265       | 18200      | 236      | 696.8   | 2443.5  | 650    |
| 1466   | 1209      | 655     | 10920        | 1940     | 540    | 7840       | 335       | 26800      | 352      | 655.2   | 6791.4  | 830    |
| 1430   | 255       | 565     | 7730         | 1140     | 618    | 12060      | 145       | 21300      | 386      | 443     | 3022.5  | 902.5  |
| 1114   | 426       | 715     | 17525        | 520      | 534    | 8340       | 565       | 7900       | 458      | 546     | 3892.2  | 3957.5 |
| 1083   | 2280      | 715     | 3560         | 600      | 596    | 6920       | 565       | 8100       | 224      | 564.9   | 3505.5  | 772.5  |
| 2301   | 259       | 770     | 10940        | 600      | 502    | 2230       | 350       | 12000      | 282      | 514.4   | 2564.1  | 782.5  |
| 1128   | 335       | 980     | 23420        | 900      | 998    | 4250       | 365       | 16500      | 339      | 516.6   | 4079.7  | 727.5  |
| 1184   | 1409      | 665     | 15160        | 600      | 950    | 1570       | 140       | 23900      | 526      | 661.5   | 2376.4  | 705    |
| 1510   | 258       | 610     | 15370        | 730      | 544    | 6300       | 425       | 19900      | 436      | 664.5   | 4161.8  | 757.5  |
| 2343   | 335       | 905     | 22260        | 600      | 796    | 3100       | 315       | 10000      | 272      | 529     | 3311.1  | 647.5  |
| 1063   | 1062      | 800     | 17320        | 880      | 522    | 1060       | 335       | 11200      | 428      | 445.2   | 2517.3  | 562.5  |
| 2040   | 1542      | 675     | 31820        | 220      | 392    | 6050       | 735       | 9700       | 358      | 573.3   | 3764.7  | 2425   |
| 1195   | 1102      | 795     | 23360        | 920      | 780    | 11810      | 950       | 23500      | 533      | 531.3   | 10150.2 | 1112.5 |
| 1343   | 2461      | 585     | 27460        | 600      | 792    | 4630       | 520       | 10500      | 968      | 663.6   | 2883.6  | 527.5  |
| 1354   | 257       | 865     | 7770         | 2300     | 454    | 2530       | 755       | 18100      | 314      | 795.3   | 5123.7  | 472.5  |
| 1925   | 513       | 730     | 8820         | 320      | 564    | 6840       | 750       | 9000       | 378      | 633     | 3652.5  | 610    |
| 1228   | 1826      | 680     | 2980         | 600      | 522    | 6580       | 795       | 8900       | 168      | 674.1   | 2376.4  | 697.5  |
| 1099   | 1889      | 965     | 10100        | 600      | 496    | 10720      | 450       | 10700      | 242      | 604.8   | 11745   | 1847.5 |
| 1608   | 2869      | 640     | 10300        | 500      | 1176   | 4380       | 355       | 13100      | 467      | 665.7   | 2826    | 840    |
| 1465.5 | 1181.3    | 734.5   | 14307.8      | 872.5    | 669.3  | 5661       | 471       | 14870      | 384.5    | 600.6   | 4229.6  | 1042.4 |
| 397.5  | 856.2     | 129.8   | 7919.3       | 600.1    | 220.6  | 3289.3     | 226.2     | 5964.3     | 170.2    | 89.5    | 2540.6  | 828.4  |

Table 6. CURL implemented on top of Efficient Rainbow - Scores reported for 20 random seeds for each of the above games, with the last two rows being the mean and standard deviation across the runs.

| UpNDown | Hero   | CrazyClimber | ChopperComm. | DemonAttack | Amidar | Alien | BankHeist | Breakout | Freeway | Pong  | PrivateEye | Boxing |
|---------|--------|--------------|--------------|-------------|--------|-------|-----------|----------|---------|-------|------------|--------|
| 3529    | 8747.5 | 19090        | 560          | 611.5       | 150.9  | 616   | 95        | 3.6      | 29.2    | -19.3 | 100        | -0.5   |
| 772     | 3026   | 8290         | 1530         | 707.5       | 131.2  | 923   | 184       | 5        | 25.4    | -16.9 | 100        | -11.4  |
| 5972    | 7146   | 12160        | 1390         | 843.5       | 141.5  | 467   | 75        | 3.2      | 27.6    | -12   | 100        | 4      |
| 2793    | 7686   | 8920         | 1100         | 330.5       | 133.7  | 441   | 232       | 5.1      | 28.6    | -19.6 | 100        | 3.6    |
| 3546    | 7335   | 11360        | 500          | 759         | 157.1  | 716   | 187       | 2.9      | 22.8    | -17.8 | 1357.4     | 6.2    |
| 4552    | 7325   | 4110         | 990          | 940         | 125.4  | 453   | 367       | 6.3      | 29.6    | -18.9 | 100        | 5      |
| 2972    | 7275.5 | 9460         | 780          | 1136        | 183.2  | 273   | 186       | 5.9      | 23.3    | -15.9 | 0          | -1.7   |
| 2865    | 3115   | 20630        | 1180         | 758         | 153.6  | 540   | 68        | 2.6      | 27.6    | -15.2 | 100        | 0.1    |
| 3098    | 7424   | 6780         | 1380         | 772.5       | 127.8  | 499   | 60        | 5.9      | 26.1    | -18.7 | 100        | 3.5    |
| 1953    | 7475   | 13570        | 970          | 820         | 149.4  | 475   | 123       | 4.3      | 28.3    | -13.3 | 100        | -0.5   |
| 1467    | 3135   | 11890        | 1200         | 784         | 125.7  | 553   | 72        | 3.2      | 21.8    | -17.2 | 1510       | -22.1  |
| 2912    | 5060.5 | 9160         | 1130         | 1080        | 130.4  | 446   | 53        | 4.8      | 21.8    | -20.1 | 100        | -1.8   |
| 4123    | 4409   | 10960        | 1380         | 847         | 133    | 533   | 68        | 6.3      | 28.9    | -16.5 | 100        | 1.6    |
| 2334    | 6979   | 17360        | 1230         | 771.5       | 140.5  | 968   | 36        | 7.3      | 28.2    | -14.9 | 100        | 3.6    |
| 2605    | 4159   | 8930         | 1350         | 907.5       | 133.8  | 499   | 53        | 4.8      | 28.3    | -19.3 | 100        | -17.6  |
| 2432    | 7560   | 11510        | 1080         | 1095.5      | 191.8  | 523   | 105       | 3.7      | 26.8    | -15.6 | 0          | 21.7   |
| 3826    | 8587   | 22690        | 1210         | 700         | 115.5  | 616   | 276       | 6.6      | 27.5    | -21   | 100        | 2      |
| 3052    | 4683.5 | 8120         | 840          | 803.5       | 164    | 475   | 69        | 5.5      | 26.5    | -10.5 | 0          | 5.9    |
| 3131    | 7317   | 13500        | 730          | 818         | 131.7  | 525   | 50        | 4.3      | 26.8    | -13.3 | 100        | 18.7   |
| 1169    | 7141   | 14440        | 640          | 866         | 122.4  | 622   | 273       | 6.2      | 28.6    | -13.1 | 100        | 3.7    |
| 2955.2  | 6279.3 | 12146.5      | 1058.5       | 817.6       | 142.1  | 558.2 | 131.6     | 4.9      | 26.7    | -16.5 | 218.4      | 1.2    |
| 1181.1  | 1871.5 | 4765.6       | 299.1        | 176.6       | 20.0   | 160.3 | 94.4      | 1.4      | 2.4     | 2.9   | 417.9      | 10.0   |

Table 7. CURL implemented on top of Efficient Rainbow - Scores reported for 20 random seeds for each of the above games, with the last two rows being the mean and standard deviation across the runs.
